# Supplementary material for: Evidences for a Nutritional Role of Iodine in Plants
Source: Front Plant Sci. 2021 Feb 17;12:616868. doi: 10.3389/fpls.2021.616868 (PMC7925997; doi:10.3389/fpls.2021.616868)
Supplement: Supplementary file 21 [file Table_13.XLSX]

## Sheet: Proteins
Table S13. Iodinated proteins identified in A. thaliana datasets retrieved from PRIDE repository. Each protein identifier has been mapped to one or more MapMan “Bins” through Mercator analysis and corresponding names and descriptions have been reported. Protein identifiers have been highlighted in pink if they were mapped to more than one Bincode. Protein identifiers were also mapped on the Arabi…
Mercator				www.arabidopsis.org							Datasets
IDENTIFIER	BINCODE	NAME	DESCRIPTION	Accession	Gene Model Description	Primary Gene Symbol	All Gene Symbols	Master Protein Accessions	Description	gene	ChlorBN	Chlo_10545	Chlo3516	PXD010730	TMAR	CAU	CLLF	Ros	LFD	LFP	LFPT	Root	RT	RTTP	RTUZ	RTTOF
atcg00120.1	'1.1.9.2.1'	'Photosynthesis.photophosphorylation.ATP synthase complex.peripheral CF1 subcomplex.subunit alpha'	'subunit alpha of peripheral CF1 subcomplex of ATP synthase complex (original description: | Symbols:ATPA | ATP synthase subunit alpha | ChrC:9938-11461 REVERSE LENGTH=507 ) &'	ATCG00120.1	Encodes the ATPase alpha subunit, which is a subunit of ATP synthase and part of the CF1 portion which catalyzes the conversion of ADP to ATP using the proton motive force. This complex is located in the thylakoid membrane of the chloroplast.	ATP SYNTHASE SUBUNIT ALPHA (ATPA)	ATP SYNTHASE SUBUNIT ALPHA (ATPA)	ATCG00120.1	ATP synthase subunit alpha	ATPA	x
atcg00480.1	'1.1.9.2.2'	'Photosynthesis.photophosphorylation.ATP synthase complex.peripheral CF1 subcomplex.subunit beta'	'subunit beta of peripheral CF1 subcomplex of ATP synthase complex (original description: | Symbols:PB,ATPB | ATP synthase subunit beta | ChrC:52660-54156 REVERSE LENGTH=498 ) &'	ATCG00480.1	chloroplast-encoded gene for beta subunit of ATP synthase	ATP SYNTHASE SUBUNIT BETA (PB)	(ATHCF1BETA); (CF1BETA);ATP SYNTHASE SUBUNIT BETA (PB);ATP SYNTHASE SUBUNIT BETA (ATPB)	ATCG00480.1	ATP synthase subunit beta	PB	x
at4g04640.1	'1.1.9.2.3'	'Photosynthesis.photophosphorylation.ATP synthase complex.peripheral CF1 subcomplex.subunit gamma'	'subunit gamma of peripheral CF1 subcomplex of ATP synthase complex (original description: | Symbols:ATPC1 | | Chr4:2350761-2351882 REVERSE LENGTH=373 ) &'	AT4G04640.1	One of two genes (with ATPC2) encoding the gamma subunit of Arabidopsis chloroplast ATP synthase.	(ATPC1)	(ATPC1)	AT4G04640.1	ATPase, F1 complex, gamma subunit protein	ATPC1	x
at1g29910.1	'1.1.1.1.1'	'Photosynthesis.photophosphorylation.photosystem II.LHC-II complex.component LHCb1/2/3'	'component LHCb1/2/3 of LHC-II complex (original description: | Symbols:CAB3,LHCB1.2,AB180 | LIGHT HARVESTING CHLOROPHYLL A/B BINDING PROTEIN 1.2,chlorophyll A/B binding protein 3 | Chr1:10472443-10473246 REVERSE LENGTH=267 ) &'	AT1G29910.1	member of Chlorophyll a/b-binding protein family	CHLOROPHYLL A/B BINDING PROTEIN 3 (CAB3)	CELLULOSE SYNTHASE LIKE B3 (CSLB3);CHLOROPHYLL A/B BINDING PROTEIN 3 (CAB3); (AB180);LIGHT HARVESTING CHLOROPHYLL A/B BINDING PROTEIN 1.2 (LHCB1.2)	AT1G29910.1	chlorophyll A/B binding protein 3	CAB3	x
at1g20340.1	'1.1.3.1'	'Photosynthesis.photophosphorylation.Cytb6/f to PS-I electron carriers.plastocyanin'	'plastocyanin electron carrier (original description: | Symbols:PETE2,DRT112 | DNA-DAMAGE-REPAIR/TOLERATION PROTEIN 112,PLASTOCYANIN 2 | Chr1:7042770-7043273 REVERSE LENGTH=167 ) &'	AT1G20340.1	recombination and DNA-damage resistance protein (DRT112) One of two Arabidopsis plastocyanin genes. Predominant form, expressed 10x higher than PETE1. PETE2 is thought to be post-transcriptionally regulated via copper accumulation and is involved in copper homeostasis. Mutation of this gene does not have obvious effect on photosynthesis. In plsp1-1 mutant plastids, the nonmature form of the prote…	DNA-DAMAGE-REPAIR/TOLERATION PROTEIN 112 (DRT112)	DNA-DAMAGE-REPAIR/TOLERATION PROTEIN 112 (DRT112);PLASTOCYANIN 2 (PETE2)	AT1G20340.1	Cupredoxin superfamily protein	DRT112						x		x
at5g66190.1	'1.1.5.2.1'	'Photosynthesis.photophosphorylation.linear electron flow.ferredoxin-NADP reductase (FNR) activity.ferredoxin-NADP oxidoreductase'	'ferredoxin-NADP oxidoreductase (original description: | Symbols:LFNR1,ATLFNR1,FNR1 | leaf-type chloroplast-targeted FNR 1,LEAF FNR 1,ferredoxin-NADP(+)-oxidoreductase 1 | Chr5:26451203-26453012 REVERSE LENGTH=360 ) &'	AT5G66190.1	Encodes a leaf-type ferredoxin:NADP(H) oxidoreductase. It is present in both chloroplast stroma and thylakoid membranes but is more abundant in the thylakoid. The affinity of this enzyme for ferredoxin is slightly, but significantly, higher than AtLFNR2, an isoform of the same enzyme. AtLFNR1 forms a heterodimer with AtFNR2 and is also a prerequisite to attach AtFNR2 to the thylakoid membrane.	FERREDOXIN-NADP(+)-OXIDOREDUCTASE 1 (FNR1)	LEAF-TYPE CHLOROPLAST-TARGETED FNR 1 (LFNR1);LEAF FNR 1 (ATLFNR1);FERREDOXIN-NADP(+)-OXIDOREDUCTASE 1 (FNR1)	AT5G66190.1	ferredoxin-NADP(+)-oxidoreductase 1	FNR1	x
at4g38970.1	'1.2.5'	'Photosynthesis.calvin cycle.fructose 1,6-bisphosphate aldolase'	'fructose 1,6-bisphosphate aldolase (original description: | Symbols:AtFBA2,FBA2 | fructose-bisphosphate aldolase 2 | Chr4:18163714-18165659 REVERSE LENGTH=398 ) &'	AT4G38970.1	Protein is tyrosine-phosphorylated and its phosphorylation state is modulated in response to ABA in Arabidopsis thaliana seeds.	FRUCTOSE-BISPHOSPHATE ALDOLASE 2 (FBA2)	(ATFBA2);FRUCTOSE-BISPHOSPHATE ALDOLASE 2 (FBA2)	AT4G38970.1	fructose-bisphosphate aldolase 2	FBA2	x
at4g38970.1	'3.12.2'	'Carbohydrate metabolism.plastidial glycolysis.fructose-1,6-bisphosphate aldolase'	'fructose-1,6-bisphosphate aldolase (original description: | Symbols:AtFBA2,FBA2 | fructose-bisphosphate aldolase 2 | Chr4:18163714-18165659 REVERSE LENGTH=398 ) &'	AT4G38970.1	Protein is tyrosine-phosphorylated and its phosphorylation state is modulated in response to ABA in Arabidopsis thaliana seeds.	FRUCTOSE-BISPHOSPHATE ALDOLASE 2 (FBA2)	(ATFBA2);FRUCTOSE-BISPHOSPHATE ALDOLASE 2 (FBA2)	AT4G38970.1	fructose-bisphosphate aldolase 2	FBA2	x
at5g42270.1	'19.4.5.8.2.1'	'Protein homeostasis.proteolysis.metallopeptidase activities.FtsH endopeptidase activities.FtsH plastidial protease complexes.component FtsH1|2|5|6|8'	'component FtsH1|2|5|6|8 of FtsH plastidial protease complexes (original description: | Symbols:FTSH5,VAR1 | VARIEGATED 1 | Chr5:16902659-16905102 FORWARD LENGTH=704 ) &'	AT5G42270.1	VAR1 contains a conserved motif for ATPase and a metalloprotease characteristic to FtsH proteins, and is targeted into chloroplasts. A VAR1-fusion protein synthesized in vitro exhibited ATPase activity and partial metalloprotease activity. This protein is located to the thylakoid membrane and forms a complex with VAR2. FtsH1 (VAR1) and FtsH5 are interchangeable in thylakoid membranes. Phosphoryla…	VARIEGATED 1 (VAR1)	VARIEGATED 1 (VAR1); (FTSH5)	AT5G42270.1	FtsH extracellular protease family	VAR1	x
at3g09260.1	'50.3.2'	'Enzyme classification.EC_3 hydrolases.EC_3.2 glycosylase'	'Beta-glucosidase 23 OS=Arabidopsis thaliana (sp|q9sr37|bgl23_arath : 1042.0) & Enzyme classification.EC_3 hydrolases.EC_3.2 glycosylase(50.3.2 : 395.9) (original description: | Symbols:LEB,BGLU23,PYK10,PSR3.1 | LONG ER BODY | Chr3:2840657-2843730 REVERSE LENGTH=524 ) &'	AT3G09260.1	Encodes beta-glucosidase.The major constituent of ER bodies. One of the most abundant proteins in Arabidopsis seedlings. Exist in an soluble (inactive) and non-soluble (active) form, most probably formed in a polymerization process. Involved in the mutualistic interaction between Arabidopsis and the endophytic fungus Piriformospora indica.	(PYK10)	LONG ER BODY (LEB); (PYK10); (PSR3.1); (BGLU23)	AT3G09260.1	Glycosyl hydrolase superfamily protein	PYK10	x
at4g10340.1	'1.1.1.1.3'	'Photosynthesis.photophosphorylation.photosystem II.LHC-II complex.component LHCb5'	'component LHCb5 of LHC-II complex (original description: | Symbols:LHCB5 | light harvesting complex of photosystem II 5 | Chr4:6408200-6409496 FORWARD LENGTH=280 ) &'	AT4G10340.1	photosystem II encoding the light-harvesting chlorophyll a/b binding protein CP26 of the antenna system of the photosynthetic apparatus The mRNA is cell-to-cell mobile.	LIGHT HARVESTING COMPLEX OF PHOTOSYSTEM II 5 (LHCB5)	CHLOROPHYLL PROTEIN 26 (CP26);LIGHT HARVESTING COMPLEX OF PHOTOSYSTEM II 5 (LHCB5)	AT4G10340.1	light harvesting complex of photosystem II 5	LHCB5	x
at5g54270.1	'1.1.1.1.1'	'Photosynthesis.photophosphorylation.photosystem II.LHC-II complex.component LHCb1/2/3'	'component LHCb1/2/3 of LHC-II complex (original description: | Symbols:LHCB3,LHCB3*1 | light-harvesting chlorophyll B-binding protein 3 | Chr5:22038424-22039383 FORWARD LENGTH=265 ) &'	AT5G54270.1	Lhcb3 protein is a component of the main light harvesting chlorophyll a/b-protein complex of Photosystem II (LHC II).	LIGHT-HARVESTING CHLOROPHYLL B-BINDING PROTEIN 3 (LHCB3)	LIGHT-HARVESTING CHLOROPHYLL B-BINDING PROTEIN 3 (LHCB3); (LHCB3*1)	AT5G54270.1	light-harvesting chlorophyll B-binding protein 3	LHCB3	x
at2g34430.1	'1.1.1.1.1'	'Photosynthesis.photophosphorylation.photosystem II.LHC-II complex.component LHCb1/2/3'	'component LHCb1/2/3 of LHC-II complex (original description: | Symbols:LHCB1.4,LHB1B1 | light-harvesting chlorophyll-protein complex II subunit B1,LIGHT-HARVESTING CHLOROPHYLL-PROTEIN COMPLEX II SUBUNIT B1 | Chr2:14524818-14525618 FORWARD LENGTH=266 ) &'	AT2G34430.1	Photosystem II type I chlorophyll a/b-binding protein The mRNA is cell-to-cell mobile.	LIGHT-HARVESTING CHLOROPHYLL-PROTEIN COMPLEX II SUBUNIT B1 (LHB1B1)	(DEG11);LIGHT-HARVESTING CHLOROPHYLL-PROTEIN COMPLEX II SUBUNIT B1 (LHCB1.4);LIGHT-HARVESTING CHLOROPHYLL-PROTEIN COMPLEX II SUBUNIT B1 (LHB1B1)	AT2G34430.1	light-harvesting chlorophyll-protein complex II subunit B1	LHB1B1	x			x					x
at2g24940.1	'11.3.2.1.4'	'Phytohormone action.brassinosteroid.perception and signal transduction.receptor complex.receptor kinase regulator protein (MSBP)'	'brassinosteroid receptor kinase regulator protein (MSBP) (original description: | Symbols:MAPR2,AtMAPR2 | membrane-associated progesterone binding protein 2 | Chr2:10609447-10609749 FORWARD LENGTH=100 ) &'	AT2G24940.1	membrane-associated progesterone binding protein 2;(source:Araport11)	MEMBRANE-ASSOCIATED PROGESTERONE BINDING PROTEIN 2 (MAPR2)	MEMBRANE-ASSOCIATED PROGESTERONE BINDING PROTEIN 2 (AtMAPR2);MEMBRANE-ASSOCIATED PROGESTERONE BINDING PROTEIN 2 (MAPR2)	AT2G24940.1	membrane-associated progesterone binding protein 2	MAPR2								x
at4g22890.1	'1.1.6.1.2'	'Photosynthesis.photophosphorylation.cyclic electron flow.PGR5/PGRL1 complex.component PGRL1-like'	'component PGRL1-like of cyclic electron flow PGR5/PGRL1 complex (original description: | Symbols:PGR5-LIKE A | | Chr4:12007157-12009175 FORWARD LENGTH=324 ) &'	AT4G22890.1	Encodes PGRL1A, a transmembrane protein present in thylakoids. PGRL1A has a highly homologous isoform PGRL1B encoded by At4g11960. Plants lacking PGRL1 show perturbation of cyclic electron flow, similar to PGR5-deficient plants. PGRL1 and PGR5 interact physically and associate with PSI (photosystem I). The mRNA is cell-to-cell mobile.	(PGR5-LIKE A)	(PGR5-LIKE A)	AT4G22890.5	PGR5-LIKE A	PGR5-LIKE A	x
atcg00540.1	'1.1.2.1'	'Photosynthesis.photophosphorylation.cytochrome b6/f complex.apocytochrome f component PetA'	'apocytochrome f component PetA of cytochrome b6/f complex (original description: | Symbols:PETA | photosynthetic electron transfer A | ChrC:61657-62619 FORWARD LENGTH=320 ) &'	ATCG00540.1	Encodes cytochrome f apoprotein; involved in photosynthetic electron transport chain; encoded by the chloroplast genome and is transcriptionally repressed by a nuclear gene HCF2.	PHOTOSYNTHETIC ELECTRON TRANSFER A (PETA)	PHOTOSYNTHETIC ELECTRON TRANSFER A (PETA)	ATCG00540.1	photosynthetic electron transfer A	PETA	x
at4g03280.1	'1.1.2.3'	'Photosynthesis.photophosphorylation.cytochrome b6/f complex.Rieske iron-sulfur component PetC'	'Rieske iron-sulfur component PetC of cytochrome b6/f complex (original description: | Symbols:PGR1,PETC | PROTON GRADIENT REGULATION 1,photosynthetic electron transfer C | Chr4:1440314-1441717 FORWARD LENGTH=229 ) &'	AT4G03280.1	Encodes the Rieske FeS center of cytochrome b6f complex. Gene is expressed in shoot but not in root. Mutant has reduced electron transport at saturating light intensities and Q-cycle activity is hypersensitive to acidification of the thylakoid lumen. The mRNA is cell-to-cell mobile.	PHOTOSYNTHETIC ELECTRON TRANSFER C (PETC)	PHOTOSYNTHETIC ELECTRON TRANSFER C (PETC);PROTON GRADIENT REGULATION 1 (PGR1)	AT4G03280.1	photosynthetic electron transfer C	PETC	x
at4g28750.1	'1.1.4.2.5'	'Photosynthesis.photophosphorylation.photosystem I.PS-I complex.component PsaE'	'component PsaE of PS-I complex (original description: | Symbols:PSAE-1 | PSA E1 KNOCKOUT | Chr4:14202951-14203888 REVERSE LENGTH=143 ) &'	AT4G28750.1	mutant has Decreased effective quantum yield of photosystem II; Pale green plants; Reduced growth rate; Subunit E of Photosystem I	PSA E1 KNOCKOUT (PSAE-1)	PSA E1 KNOCKOUT (PSAE-1)	AT4G28750.1	Photosystem I reaction centre subunit IV / PsaE protein	PSAE-1	x
at2g20260.1	'1.1.4.2.5'	'Photosynthesis.photophosphorylation.photosystem I.PS-I complex.component PsaE'	'component PsaE of PS-I complex (original description: | Symbols:PSAE-2 | photosystem I subunit E-2 | Chr2:8736780-8737644 FORWARD LENGTH=145 ) &'	AT2G20260.1	Encodes subunit E of photosystem I. The mRNA is cell-to-cell mobile.	PHOTOSYSTEM I SUBUNIT E-2 (PSAE-2)	PHOTOSYSTEM I SUBUNIT E-2 (PSAE-2)	AT2G20260.1	photosystem I subunit E-2	PSAE-2	x
at1g31330.1	'1.1.4.2.6'	'Photosynthesis.photophosphorylation.photosystem I.PS-I complex.component PsaF'	'component PsaF of PS-I complex (original description: | Symbols:PSAF | photosystem I subunit F | Chr1:11215011-11215939 REVERSE LENGTH=221 ) &'	AT1G31330.1	Encodes subunit F of photosystem I.	PHOTOSYSTEM I SUBUNIT F (PSAF)	PHOTOSYSTEM I SUBUNIT F (PSAF)	AT1G31330.1	photosystem I subunit F	PSAF	x							x
at1g52230.1	'1.1.4.2.8'	'Photosynthesis.photophosphorylation.photosystem I.PS-I complex.component PsaH'	'component PsaH of PS-I complex (original description: | Symbols:PSI-H,PSAH-2,PSAH2 | photosystem I subunit H2,PHOTOSYSTEM I SUBUNIT H-2 | Chr1:19454902-19455508 FORWARD LENGTH=145 ) &'	AT1G52230.1	Phosphorylation of this protein is dependent on calcium. The mRNA is cell-to-cell mobile.	PHOTOSYSTEM I SUBUNIT H2 (PSAH2)	(PSI-H);PHOTOSYSTEM I SUBUNIT H2 (PSAH2);PHOTOSYSTEM I SUBUNIT H-2 (PSAH-2)	AT1G52230.1	photosystem I subunit H2	PSAH2	x
atcg00340.1	'1.1.4.2.2'	'Photosynthesis.photophosphorylation.photosystem I.PS-I complex.apoprotein component PsaB'	'apoprotein PsaB of PS-I complex (original description: | Symbols:PSAB | | ChrC:37375-39579 REVERSE LENGTH=734 ) &'	ATCG00340.1	Encodes the D1 subunit of photosystem I reaction center.	(PSAB)	(PSAB)	ATCG00340.1	Photosystem I, PsaA/PsaB protein	PSAB	x
at1g03600.1	'1.1.1.3.8'	'Photosynthesis.photophosphorylation.photosystem II.assembly and maintenance.regulatory protein (Psb27)'	'Psb27 protein involved in PS-II assembly (original description: | Symbols:PSB27 | | Chr1:898916-899440 FORWARD LENGTH=174 ) &'	AT1G03600.1	PSB27 is a chloroplast lumen localized protein that is involved in adaptation to changes in light intensity.	(PSB27)	(PSB27)	AT1G03600.1	photosystem II family protein	PSB27	x
at1g06680.1	'1.1.1.2.2.2.1'	'Photosynthesis.photophosphorylation.photosystem II.PS-II complex.oxygen-evolving center (OEC) extrinsic proteins.Viridiplantae-specific components.component OEC23/PsbP'	'component PsbP of PS-II oxygen-evolving center (original description: | Symbols:OE23,PSII-P,PSBP-1,OEE2 | OXYGEN-EVOLVING ENHANCER PROTEIN 2,PHOTOSYSTEM II SUBUNIT P,photosystem II subunit P-1,OXYGEN EVOLVING COMPLEX SUBUNIT 23 KDA | Chr1:2047940-2049186 FORWARD LENGTH=263 ) &'	AT1G06680.1	Encodes a 23 kD extrinsic protein that is part of photosystem II and participates in the regulation of oxygen evolution. Phosphorylation of this protein is dependent on calcium. In plsp1-1 mutant plastids, the nonmature form of the protein localizes in the stroma. The mRNA is cell-to-cell mobile.	PHOTOSYSTEM II SUBUNIT P-1 (PSBP-1)	OXYGEN EVOLVING COMPLEX SUBUNIT 23 KDA (OE23);PHOTOSYSTEM II SUBUNIT P-1 (PSBP-1);OXYGEN-EVOLVING ENHANCER PROTEIN 2 (OEE2);PHOTOSYSTEM II SUBUNIT P (PSII-P)	AT1G06680.1	photosystem II subunit P-1	PSBP-1	x			x
at1g79040.1	'1.1.1.2.9'	'Photosynthesis.photophosphorylation.photosystem II.PS-II complex.component PsbR'	'component PsbR of PS-II complex (original description: | Symbols:PSBR | photosystem II subunit R | Chr1:29736085-29736781 FORWARD LENGTH=140 ) &'	AT1G79040.1	Encodes for the 10 kDa PsbR subunit of photosystem II (PSII). This subunit appears to be involved in the stable assembly of PSII, particularly that of the oxygen-evolving complex subunit PsbP. Mutants defective in this gene have reduced amounts of subunits PsbP and PsbQ in PSII. In turn, assembly of PsbR is dependent on the presence of PsbJ.	PHOTOSYSTEM II SUBUNIT R (PSBR)	PHOTOSYSTEM II SUBUNIT R (PSBR)	AT1G79040.1	photosystem II subunit R	PSBR	x
at2g05100.1	'1.1.1.1.1'	'Photosynthesis.photophosphorylation.photosystem II.LHC-II complex.component LHCb1/2/3'	'component LHCb1/2/3 of LHC-II complex (original description: | Symbols:LHCB2,LHCB2.1 | LIGHT-HARVESTING CHLOROPHYLL B-BINDING 2,photosystem II light harvesting complex gene 2.1 | Chr2:1823449-1824331 REVERSE LENGTH=265 ) &'	AT2G05100.1	Lhcb2.1 protein encoding a subunit of the light harvesting complex II. Member of a gene family with high degree of sequence similarity. Initially LHCB2.3 was considered as a separate gene but appears to be an allele of LHCB2.1.	PHOTOSYSTEM II LIGHT HARVESTING COMPLEX GENE 2.1 (LHCB2.1)	LIGHT-HARVESTING CHLOROPHYLL B-BINDING 2 (LHCB2);PHOTOSYSTEM II LIGHT HARVESTING COMPLEX GENE 2.1 (LHCB2.1)	AT2G05100.1	photosystem II light harvesting complex gene 2.1	LHCB2.1	x
at2g20890.1	'1.1.1.3.10'	'Photosynthesis.photophosphorylation.photosystem II.assembly and maintenance.assembly factor (Psb29)'	'Psb29 protein involved in PS-II assembly (original description: | Symbols:THF1,PSB29 | THYLAKOID FORMATION1,photosystem II reaction center PSB29 protein | Chr2:8987783-8989185 FORWARD LENGTH=300 ) &'	AT2G20890.1	Chloroplast-localized Thylakoid formation1 gene product involved in vesicle-mediated formation of thylakoid membranes. Thf1 antisense lines contain abnormal chloroplasts early in leaf development (chloroplasts have loosely stacked thylakoid membranes). Expression was induced in the light and decreased under dark conditions. G-alpha interaction partner that functions downstream of the plasma membr…	PHOTOSYSTEM II REACTION CENTER PSB29 PROTEIN (PSB29)	PHOTOSYSTEM II REACTION CENTER PSB29 PROTEIN (PSB29);THYLAKOID FORMATION1 (THF1)	AT2G20890.1	photosystem II reaction center PSB29 protein	PSB29	x
at2g30790.1	'1.1.1.2.2.2.1'	'Photosynthesis.photophosphorylation.photosystem II.PS-II complex.oxygen-evolving center (OEC) extrinsic proteins.Viridiplantae-specific components.component OEC23/PsbP'	'component PsbP of PS-II oxygen-evolving center (original description: | Symbols:PSBP-2 | photosystem II subunit P-2 | Chr2:13119047-13119596 REVERSE LENGTH=125 ) &'	AT2G30790.1	Encodes a 23 kD extrinsic protein that is part of photosystem II and participates in the regulation of oxygen evolution.	PHOTOSYSTEM II SUBUNIT P-2 (PSBP-2)	PHOTOSYSTEM II SUBUNIT P-2 (PSBP-2)	AT2G30790.1	photosystem II subunit P-2	PSBP-2	x
at3g50820.1	'1.1.1.2.2.1'	'Photosynthesis.photophosphorylation.photosystem II.PS-II complex.oxygen-evolving center (OEC) extrinsic proteins.component OEC33/PsbO'	'component PsbO/OEC33 of PS-II oxygen-evolving center (original description: | Symbols:OEC33,PSBO-2,PSBO2 | photosystem II subunit O-2,OXYGEN EVOLVING COMPLEX SUBUNIT 33 KDA,PHOTOSYSTEM II SUBUNIT O-2 | Chr3:18891008-18892311 REVERSE LENGTH=331 ) &'	AT3G50820.1	Encodes a protein which is an extrinsic subunit of photosystem II and which has been proposed to play a central role in stabilization of the catalytic manganese cluster. In <i>Arabidopsis thaliana</i> the PsbO proteins are encoded by two genes: <i>psbO1</i> and <i>psbO2</i>. PsbO2 is the minor isoform in the wild-type. Mutants defective in this gene have been shown to be affected in the dephospho…	PHOTOSYSTEM II SUBUNIT O-2 (PSBO2)	OXYGEN EVOLVING COMPLEX SUBUNIT 33 KDA (OEC33);PHOTOSYSTEM II SUBUNIT O-2 (PSBO2);PHOTOSYSTEM II SUBUNIT O-2 (PSBO-2)	AT3G50820.1	photosystem II subunit O-2	PSBO2	x		x
at4g05180.1	'1.1.1.2.2.2.2'	'Photosynthesis.photophosphorylation.photosystem II.PS-II complex.oxygen-evolving center (OEC) extrinsic proteins.Viridiplantae-specific components.component OEC16/PsbQ'	'component PsbQ of PS-II oxygen-evolving center (original description: | Symbols:PSBQ-2,PSBQ,PSII-Q | photosystem II subunit Q-2,PHOTOSYSTEM II SUBUNIT Q | Chr4:2672093-2673170 REVERSE LENGTH=230 ) &'	AT4G05180.1	Encodes the PsbQ subunit of the oxygen evolving complex of photosystem II.	PHOTOSYSTEM II SUBUNIT Q-2 (PSBQ-2)	(PSII-Q);PHOTOSYSTEM II SUBUNIT Q (PSBQ);PHOTOSYSTEM II SUBUNIT Q-2 (PSBQ-2)	AT4G05180.1	photosystem II subunit Q-2	PSBQ-2	x
at4g21280.2	'1.1.1.2.2.2.2'	'Photosynthesis.photophosphorylation.photosystem II.PS-II complex.oxygen-evolving center (OEC) extrinsic proteins.Viridiplantae-specific components.component OEC16/PsbQ'	'component PsbQ of PS-II oxygen-evolving center (original description: | Symbols:PSBQ-1,PSBQA,PSBQ | photosystem II subunit QA,PHOTOSYSTEM II SUBUNIT Q-1,PHOTOSYSTEM II SUBUNIT Q | Chr4:11334446-11335587 FORWARD LENGTH=224 ) &'	AT4G21280.2	Encodes the PsbQ subunit of the oxygen evolving complex of photosystem II.	PHOTOSYSTEM II SUBUNIT QA (PSBQA)	PHOTOSYSTEM II SUBUNIT Q-1 (PSBQ-1);PHOTOSYSTEM II SUBUNIT Q (PSBQ);PHOTOSYSTEM II SUBUNIT QA (PSBQA)	AT4G21280.1	photosystem II subunit QA	PSBQA	x
atcg00020.1	'1.1.1.2.1.1'	'Photosynthesis.photophosphorylation.photosystem II.PS-II complex.reaction center complex.component D1/PsbA'	'component PsbA/D1 of PS-II reaction center complex (original description: | Symbols:PSBA | photosystem II reaction center protein A | ChrC:383-1444 REVERSE LENGTH=353 ) &'	ATCG00020.1	Encodes chlorophyll binding protein D1, a part of the photosystem II reaction center core	PHOTOSYSTEM II REACTION CENTER PROTEIN A (PSBA)	PHOTOSYSTEM II REACTION CENTER PROTEIN A (PSBA)	ATCG00020.1	photosystem II reaction center protein A	PSBA	x				x
atcg00270.1	'1.1.1.2.1.2'	'Photosynthesis.photophosphorylation.photosystem II.PS-II complex.reaction center complex.component D2/PsbD'	'component PsbD/D2 of PS-II reaction center complex (original description: | Symbols:PSBD | photosystem II reaction center protein D | ChrC:32711-33772 FORWARD LENGTH=353 ) &'	ATCG00270.1	PSII D2 protein	PHOTOSYSTEM II REACTION CENTER PROTEIN D (PSBD)	PHOTOSYSTEM II REACTION CENTER PROTEIN D (PSBD)	ATCG00270.1	photosystem II reaction center protein D	PSBD	x
atcg00280.1	'1.1.1.2.1.4'	'Photosynthesis.photophosphorylation.photosystem II.PS-II complex.reaction center complex.component CP43/PsbC'	'component PsbC/CP43 of PS-II reaction center complex (original description: | Symbols:PSBC | photosystem II reaction center protein C | ChrC:33720-35141 FORWARD LENGTH=473 ) &'	ATCG00280.1	chloroplast gene encoding a CP43 subunit of the photosystem II reaction center. promoter contains a blue-light responsive element.	PHOTOSYSTEM II REACTION CENTER PROTEIN C (PSBC)	PHOTOSYSTEM II REACTION CENTER PROTEIN C (PSBC)	ATCG00280.1	photosystem II reaction center protein C	PSBC									x
atcg00680.1	'1.1.1.2.1.3'	'Photosynthesis.photophosphorylation.photosystem II.PS-II complex.reaction center complex.component CP47/PsbB'	'component PsbB/CP47 of PS-II reaction center complex (original description: | Symbols:PSBB | photosystem II reaction center protein B | ChrC:72371-73897 FORWARD LENGTH=508 ) &'	ATCG00680.1	encodes for CP47, subunit of the photosystem II reaction center.	PHOTOSYSTEM II REACTION CENTER PROTEIN B (PSBB)	PHOTOSYSTEM II REACTION CENTER PROTEIN B (PSBB)	ATCG00680.1	photosystem II reaction center protein B	PSBB	x				x	x		x
at5g07020.1	'1.1.1.5.2'	'Photosynthesis.photophosphorylation.photosystem II.photoprotection.protein (MPH1)'	'MPH1 protein involved in photoprotection (original description: | Symbols:MPH1 | Maintenance of PSII under High light 1 | Chr5:2180669-2182284 REVERSE LENGTH=235 ) &'	AT5G07020.1	Encodes an integral thylakoid membrane protein that interacts with PSII core complexes and contributes to the maintenance of PSII homeostasis upon exposure to photoinhibitory light conditions by participating in the protection and stabilization of PSII under photoinhibitory stress.	MAINTENANCE OF PSII UNDER HIGH LIGHT 1 (MPH1)	MAINTENANCE OF PSII UNDER HIGH LIGHT 1 (MPH1)	AT5G07020.1	proline-rich family protein	MPH1	x
at1g74470.1	'7.12.6.6.3'	'Coenzyme metabolism.tetrapyrrol biosynthesis.chlorophyll metabolism.chlorophyll(ide) interconversions.geranylgeranyl reductase (ChlP)'	'geranylgeranyl reductase (ChlP) (original description: | Symbols:no symbol available | no full name available | Chr1:27991248-27992845 FORWARD LENGTH=467 ) &'	AT1G74470.1	Encodes for a multifunctional protein with geranylgeranyl reductase activity shown to catalyze the reduction of prenylated geranylgeranyl-chlorophyll a to phytyl-chlorophyll a (chlorophyll a) and free geranylgeranyl pyrophosphate to phytyl pyrophosphate. The mRNA is cell-to-cell mobile.	0	0	AT1G74470.1	Pyridine nucleotide-disulphide oxidoreductase family protein	0	x
atmg00280.1	'35.1'	'not assigned.annotated'	' (original description: | Symbols:ORF110A | | ChrM:77819-78151 REVERSE LENGTH=110 ) & Putative uncharacterized mitochondrial protein AtMg00280 OS=Arabidopsis thaliana (sp|p93292|m280_arath : 225.0)'	ATMG00280.1	Ribulose bisphosphate carboxylase large chain, catalytic domain-containing protein;(source:Araport11)	(ORF110A)	(ORF110A)	ATMG00280.1	Ribulose bisphosphate carboxylase large chain, catalytic domain	ORF110A							x		x	x	x
at1g67090.1	'1.2.1.1.2'	'Photosynthesis.calvin cycle.ribulose-1,5-bisphosphat carboxylase/oxygenase (RuBisCo) activity.RuBisCo heterodimer.small subunit'	'small subunit of ribulose-1,5-bisphosphat carboxylase/oxygenase heterodimer (original description: | Symbols:RBCS1A | ribulose bisphosphate carboxylase small chain 1A | Chr1:25048465-25049249 REVERSE LENGTH=180 ) &'	AT1G67090.1	Encodes a member of the Rubisco small subunit (RBCS) multigene family: RBCS1A (At1g67090), RBCS1B (At5g38430), RBCS2B (At5g38420), and RBCS3B (At5g38410). Functions to yield sufficient Rubisco content for leaf photosynthetic capacity.	RIBULOSE BISPHOSPHATE CARBOXYLASE SMALL CHAIN 1A (RBCS1A)	RIBULOSE BISPHOSPHATE CARBOXYLASE SMALL CHAIN 1A (RBCS1A)	AT1G67090.1	ribulose bisphosphate carboxylase small chain 1A	RBCS1A	x					x		x
atcg00490.1	'1.2.1.1.1'	'Photosynthesis.calvin cycle.ribulose-1,5-bisphosphat carboxylase/oxygenase (RuBisCo) activity.RuBisCo heterodimer.large subunit'	'large subunit of ribulose-1,5-bisphosphat carboxylase/oxygenase heterodimer (original description: | Symbols:RBCL | | ChrC:54958-56397 FORWARD LENGTH=479 ) &'	ATCG00490.1	large subunit of RUBISCO. Protein is tyrosine-phosphorylated and its phosphorylation state is modulated in response to ABA in Arabidopsis thaliana seeds.	(RBCL)	(RBCL)	ATCG00490.1	ribulose-bisphosphate carboxylases	RBCL	x	x				x
at1g71500.1	'1.1.1.3.13'	'Photosynthesis.photophosphorylation.photosystem II.assembly and maintenance.stabilizing factor (Psb33)'	'Psb33 protein involved in PS-II assembly (original description: | Symbols:PSB33 | PhotoSystem B protein 33 | Chr1:26936084-26937331 FORWARD LENGTH=287 ) &'	AT1G71500.1	Encodes PSB33, a protein conserved in the plastid lineage. PSB33 is associated with the chloroplast thylakoid membrane and provides stability to Photosystem II. The mRNA is cell-to-cell mobile.	PHOTOSYSTEM B PROTEIN 33 (PSB33)	PHOTOSYSTEM B PROTEIN 33 (PSB33);LIGHT-HARVESTING-LIKE 8 (LIL8)	AT1G71500.1	Rieske (2Fe-2S) domain-containing protein	PSB33	x
at2g39730.1	'1.2.1.3.2'	'Photosynthesis.calvin cycle.ribulose-1,5-bisphosphat carboxylase/oxygenase (RuBisCo) activity.RuBisCo regulation.ATP-dependent activase (RCA)'	'ATP-dependent activase involved in RuBisCo regulation (original description: | Symbols:RCA | rubisco activase | Chr2:16570951-16573345 REVERSE LENGTH=474 ) &'	AT2G39730.1	Rubisco activase, a nuclear-encoded chloroplast protein that consists of two isoforms arising from alternative splicing in most plants. Required for the light activation of rubisco. Involved in jasmonate-induced leaf senescence.	RUBISCO ACTIVASE (RCA)	RUBISCO ACTIVASE (RCA)	AT2G39730.1	rubisco activase	RCA	x
at1g54780.1	'1.1.1.3.12'	'Photosynthesis.photophosphorylation.photosystem II.assembly and maintenance.assembly factor (Psb32)'	'Psb32 protein involved in PS-II assembly (original description: | Symbols:TLP18.3,AtTLP18.3 | thylakoid lumen protein 18.3 | Chr1:20439533-20440953 FORWARD LENGTH=285 ) &'	AT1G54780.1	Encodes a thylakoid lumen protein regulating photosystem II repair cycle. Has acid phosphatase activity. The mRNA is cell-to-cell mobile.	THYLAKOID LUMEN PROTEIN 18.3 (TLP18.3)	THYLAKOID LUMEN PROTEIN 18.3 (TLP18.3); (ATTLP18.3)	AT1G54780.1	thylakoid lumen 18.3 kDa protein	TLP18.3	x
at5g09810.1	'20.2.1'	'Cytoskeleton organisation.microfilament network.actin filament protein'	'actin filament protein (original description: | Symbols:AtACT7,ACT7 | actin 7 | Chr5:3052809-3054220 FORWARD LENGTH=377 ) &'	AT5G09810.1	Member of Actin gene family.Mutants are defective in germination and root growth. The mRNA is cell-to-cell mobile.	ACTIN 7 (ACT7)	(ATACT7);ACTIN 2 (ACT2);ACTIN 7 (ACT7)	AT5G09810.1	actin 7	ACT7												x
at1g28290.1	'35.1'	'not assigned.annotated'	' (original description: | Symbols:AGP31 | arabinogalactan protein 31 | Chr1:9889331-9890843 REVERSE LENGTH=359 ) & Non-classical arabinogalactan protein 31 OS=Arabidopsis thaliana (sp|q9fza2|agp31_arath : 249.0)'	AT1G28290.1	Encodes an atypical arabinogalactan protein that is localized to the plasma membrange. AGP31 is highly expressed in flowers and vascular tissue and is repressed by jasmonic acid. AGP31 may play a role in vascular tissue function during defense and development.	ARABINOGALACTAN PROTEIN 31 (AGP31)	ARABINOGALACTAN PROTEIN 31 (AGP31)	AT1G28290.1	arabinogalactan protein 31	AGP31													x
at5g08680.1	'2.4.6.2.2'	'Cellular respiration.oxidative phosphorylation.ATP synthase complex.peripheral MF1 subcomplex.subunit beta'	'subunit beta of ATP synthase peripheral MF1 subcomplex (original description: | Symbols:no symbol available | no full name available | Chr5:2821992-2824683 FORWARD LENGTH=559 ) &'	AT5G08680.1	Encodes the mitochondrial ATP synthase beta-subunit. This subunit is encoded by a multigene family of three members (At5g08670, At5g08680, At5g08690) that shared 98% sequence identity at the amino acid level. The mRNA is cell-to-cell mobile.	0	0	AT5G08680.1	ATP synthase alpha/beta family protein	0												x
at1g45130.1	'21.3.2.2.2'	'Cell wall organisation.pectin.rhamnogalacturonan I.modification and degradation.beta-galactosidase (BGAL)'	'beta-galactosidase (BGAL) (original description: | Symbols:AtBGAL5,BGAL5 | beta-galactosidase 5 | Chr1:17065447-17069110 FORWARD LENGTH=732 ) &'	AT1G45130.1	beta-galactosidase 5;(source:Araport11)	BETA-GALACTOSIDASE 5 (BGAL5)	BETA-GALACTOSIDASE 5 (BGAL5); (ATBGAL5)	AT1G45130.1	beta-galactosidase 5	BGAL5													x	x	x
at2g43610.1	'35.1'	'not assigned.annotated'	' (original description: | Symbols:no symbol available | no full name available | Chr2:18088058-18089184 REVERSE LENGTH=281 ) & Endochitinase At2g43610 OS=Arabidopsis thaliana (sp|o22842|chi61_arath : 485.0)'	AT2G43610.1	Chitinase family protein;(source:Araport11)	0	0	AT2G43610.1	Chitinase family protein	0												x
at3g43670.1	'8.5.1'	'Polyamine metabolism.polyamine degradation.copper-containing amine oxidase (CuAO)'	'copper-containing amine oxidase (CuAO) (original description: | Symbols:no symbol available | no full name available | Chr3:15567144-15569734 FORWARD LENGTH=687 ) &'	AT3G43670.1	Copper amine oxidase family protein;(source:Araport11)	COPPER AMINE OXIDASE GAMMA 2 (CUAO&#947;2)	COPPER AMINE OXIDASE GAMMA 2 (CUAO&#947;2)	AT3G43670.1	Copper amine oxidase family protein	CUAOγ2													x		x
at1g78850.1	'35.1'	'not assigned.annotated'	' (original description: | Symbols:no symbol available | no full name available | Chr1:29642072-29643397 REVERSE LENGTH=441 ) & EP1-like glycoprotein 3 OS=Arabidopsis thaliana (sp|q9zva4|ep1l3_arath : 893.0)'	AT1G78850.1	curculin-like (mannose-binding) lectin family protein, low similarity to ser/thr protein kinase from Zea mays (GI:2598067); contains Pfam lectin (probable mannose binding) domain PF01453 but not the protein kinase domain of the Z. mays protein. Belongs to GNA domain lectin family. Enhances PAP26 function to facilitate Pi-scavenging by Pi-starved plants.	MANNOSE BINDING LECTIN1 (MBL1)	MANNOSE BINDING LECTIN1 (MBL1);APPLE DOMAIN LECTIN-1 (GAL1)	AT1G78850.1	D-mannose binding lectin protein	MBL1												x	x	x
at5g20080.1	'50.1.6'	'Enzyme classification.EC_1 oxidoreductases.EC_1.6 oxidoreductase acting on NADH or NADPH'	'NADH-cytochrome b5 reductase-like protein OS=Arabidopsis thaliana (sp|p83291|nb5r2_arath : 661.0) & Enzyme classification.EC_1 oxidoreductases.EC_1.6 oxidoreductase acting on NADH or NADPH(50.1.6 : 213.5) (original description: | Symbols:no symbol available | no full name available | Chr5:6782708-6786360 FORWARD LENGTH=328 ) &'	AT5G20080.1	FAD/NAD(P)-binding oxidoreductase;(source:Araport11)	0	0	AT5G20080.1	FAD/NAD(P)-binding oxidoreductase	0												x
at4g20830.1	'50.1.1'	'Enzyme classification.EC_1 oxidoreductases.EC_1.1 oxidoreductase acting on CH-OH group of donor'	'Berberine bridge enzyme-like 19 OS=Arabidopsis thaliana (sp|q9svg4|retol_arath : 967.0) & Enzyme classification.EC_1 oxidoreductases.EC_1.1 oxidoreductase acting on CH-OH group of donor(50.1.1 : 450.4) (original description: | Symbols:AtBBE20,AtBBE19 | | Chr4:11155486-11157577 FORWARD LENGTH=570 ) &'	AT4G20830.1	Encodes an oligogalacturonide oxidase that inactivates the elicitor-active oligogalacturonides (OGs). It is involved in plant immunity. Overexpressing plants are more resistant to B. cinerea.	(ATBBE19)	(ATBBE19);OLIGOGALACTURONIDE OXIDASE 1 (OGOX1)	AT4G20830.1	FAD-binding Berberine family protein	ATBBE19														x
at5g44380.1	'50.1.1'	'Enzyme classification.EC_1 oxidoreductases.EC_1.1 oxidoreductase acting on CH-OH group of donor'	'Berberine bridge enzyme-like 24 OS=Arabidopsis thaliana (sp|q9fkv0|bbe24_arath : 1027.0) & Enzyme classification.EC_1 oxidoreductases.EC_1.1 oxidoreductase acting on CH-OH group of donor(50.1.1 : 511.5) (original description: | Symbols:AtBBE28 | | Chr5:17878873-17881369 REVERSE LENGTH=541 ) &'	AT5G44380.1	FAD-binding Berberine family protein;(source:Araport11)	(ATBBE28)	(ATBBE28)	AT5G44380.1	FAD-binding Berberine family protein	ATBBE28															x
at5g50950.1	'2.3.7'	'Cellular respiration.tricarboxylic acid cycle.fumarase'	'fumarase (original description: | Symbols:FUM2 | FUMARASE 2 | Chr5:20729687-20733476 FORWARD LENGTH=510 ) &'	AT5G50950.1	Encodes a fumarase enzyme initially shown to be in the mitochondria through proteomic studies but later shown to be present in the cytosol using an RFP fluorescent protein tag. It appears to be important for the accumulation of fumarate from malate in leaves in the light, and helps to promote nitrogen assimilation under high nitrogen conditions. It does not appear to be necessary for lipid metabo…	FUMARASE 2 (FUM2)	FUMARASE 2 (FUM2)	AT5G50950.1	FUMARASE 2	FUM2												x
at3g04120.1	'2.1.1.4.1'	'Cellular respiration.glycolysis.cytosolic glycolysis.glyceraldehyde 3-phosphate dehydrogenase activities.NAD-dependent glyceraldehyde 3-phosphate dehydrogenase'	'NAD-dependent glyceraldehyde 3-phosphate dehydrogenase (original description: | Symbols:GAPC1,GAPC,GAPC-1 | GLYCERALDEHYDE-3-PHOSPHATE DEHYDROGENASE C SUBUNIT,glyceraldehyde-3-phosphate dehydrogenase C subunit 1 | Chr3:1081077-1083131 FORWARD LENGTH=338 ) &'	AT3G04120.1	encodes cytosolic GADPH (C subunit) involved in the glycolytic pathway but also interacts with H2O2 potentially placing it in a signalling cascade induced by ROS. The mRNA is cell-to-cell mobile.	GLYCERALDEHYDE-3-PHOSPHATE DEHYDROGENASE C SUBUNIT 1 (GAPC1)	GLYCERALDEHYDE-3-PHOSPHATE DEHYDROGENASE C SUBUNIT 1 (GAPC1);GLYCERALDEHYDE-3-PHOSPHATE DEHYDROGENASE C SUBUNIT (GAPC); (GAPC-1)	AT3G04120.1	glyceraldehyde-3-phosphate dehydrogenase C sub 1	GAPC1													x	x	x
at4g16260.1	'50.3.2'	'Enzyme classification.EC_3 hydrolases.EC_3.2 glycosylase'	'Probable glucan endo-1,3-beta-glucosidase At4g16260 OS=Arabidopsis thaliana (sp|q8vzj2|bgnem_arath : 631.0) & Enzyme classification.EC_3 hydrolases.EC_3.2 glycosylase(50.3.2 : 446.7) (original description: | Symbols:no symbol available | no full name available | Chr4:9200180-9201441 REVERSE LENGTH=344 ) &'	AT4G16260.1	Encodes a putative beta-1,3-endoglucanase that interacts with the 30C02 cyst nematode effector. May play a role in host defense.	0	0	AT4G16260.1	Glycosyl hydrolase superfamily protein	0												x
at3g13790.1	'3.1.4.1.1'	'Carbohydrate metabolism.sucrose metabolism.degradation.invertase activities.acid beta-fructofuranosidase (CWIN)'	'acid beta-fructofuranosidase (CWIN) (original description: | Symbols:ATBFRUCT1,CWI1,AtCWI1,ATCWINV1 | ARABIDOPSIS THALIANA CELL WALL INVERTASE 1 | Chr3:4533084-4535831 REVERSE LENGTH=584 ) &'	AT3G13790.1	Encodes a protein with invertase activity.	(ATBFRUCT1)	(ATCWI1);ARABIDOPSIS THALIANA CELL WALL INVERTASE 1 (ATCWINV1); (ATBFRUCT1); (CWI1)	AT3G13790.1	Glycosyl hydrolases family 32 protein	ATBFRUCT1													x		x
at3g19390.1	'50.3.4'	'Enzyme classification.EC_3 hydrolases.EC_3.4 hydrolase acting on peptide bond (peptidase)'	'Probable cysteine protease RD21C OS=Arabidopsis thaliana (sp|q9lt78|rd21c_arath : 800.0) & Enzyme classification.EC_3 hydrolases.EC_3.4 hydrolase acting on peptide bond (peptidase)(50.3.4 : 346.4) (original description: | Symbols:no symbol available | no full name available | Chr3:6723024-6724768 FORWARD LENGTH=452 ) &'	AT3G19390.1	Granulin repeat cysteine protease family protein;(source:Araport11)	0	0	AT3G19390.1	Granulin repeat cysteine protease family protein	0												x
at3g12580.1	'19.1.5.1'	'Protein homeostasis.protein quality control.cytosolic Hsp70 chaperone system.chaperone (Hsp70)'	'chaperone (Hsp70) (original description: | Symbols:HSP70,ATHSP70 | ARABIDOPSIS HEAT SHOCK PROTEIN 70,heat shock protein 70 | Chr3:3991487-3993689 REVERSE LENGTH=650 ) &'	AT3G12580.1	heat shock protein 70;(source:Araport11)	HEAT SHOCK PROTEIN 70 (HSP70)	HEAT SHOCK PROTEIN 70 (HSP70); (HSC70-4);ARABIDOPSIS HEAT SHOCK PROTEIN 70 (ATHSP70)	AT3G12580.1	heat shock protein 70	HSP70												x
at5g42020.1	'35.1'	'not assigned.annotated'	' (original description: | Symbols:BIP2,BIP | luminal binding protein | Chr5:16807697-16810480 REVERSE LENGTH=668 ) & Mediator of RNA polymerase II transcription subunit 37f OS=Arabidopsis thaliana (sp|q39043|md37f_arath : 1157.0)'	AT5G42020.1	Luminal binding protein (BiP2) involved in polar nuclei fusion during proliferation of endosperm nuclei.	(BIP2)	(BIP2);LUMINAL BINDING PROTEIN (BIP)	AT5G42020.1	Heat shock protein 70 (Hsp 70) family protein	BIP2												x
at3g16430.1	'35.1'	'not assigned.annotated'	' (original description: | Symbols:JAL31,PBPII | jacalin-related lectin 31 | Chr3:5581830-5582959 FORWARD LENGTH=296 ) & PYK10-binding protein 2 OS=Arabidopsis thaliana (sp|o04313|jal31_arath : 554.0)'	AT3G16430.1	Encodes a protein that increases the beta-glucosidase activities of three scopolin glucosidases in vitro.	JACALIN-RELATED LECTIN 31 (JAL31)	JACALIN-RELATED LECTIN 31 (JAL31); (PBPII)	AT3G16430.1	jacalin-related lectin 31	JAL31												x
at2g22170.1	'35.1'	'not assigned.annotated'	' (original description: | Symbols:PLAT2 | PLAT domain protein 2 | Chr2:9427010-9427742 REVERSE LENGTH=183 ) & PLAT domain-containing protein 2 OS=Arabidopsis thaliana (sp|q9sie7|plat2_arath : 376.0)'	AT2G22170.1	Lipase/lipooxygenase, PLAT/LH2 family protein;(source:Araport11)	PLAT DOMAIN PROTEIN 2 (PLAT2)	PLAT DOMAIN PROTEIN 2 (PLAT2)	AT2G22170.1	Lipase/lipooxygenase, PLAT/LH2 family protein	PLAT2												x
at3g16460.1	'35.1'	'not assigned.annotated'	' (original description: | Symbols:JAL34 | jacalin-related lectin 34 | Chr3:5593029-5595522 FORWARD LENGTH=705 ) & Jacalin-related lectin 34 OS=Arabidopsis thaliana (sp|o04310|jal34_arath : 816.0)'	AT3G16460.1	Mannose-binding protein	JACALIN-RELATED LECTIN 34 (JAL34)	JACALIN-RELATED LECTIN 34 (JAL34)	AT3G16460.1	Mannose-binding lectin superfamily protein	JAL34												x
at3g48890.1	'11.3.2.1.4'	'Phytohormone action.brassinosteroid.perception and signal transduction.receptor complex.receptor kinase regulator protein (MSBP)'	'brassinosteroid receptor kinase regulator protein (MSBP) (original description: | Symbols:MSBP2,MAPR3,ATMAPR3,ATMP2 | ARABIDOPSIS THALIANA MEMBRANE-ASSOCIATED PROGESTERONE BINDING PROTEIN 3,membrane-associated progesterone binding protein 3,MEMBRANE STEROID BINDING PROTEIN 2 | Chr3:18129669-18131353 FORWARD LENGTH=233 ) &'	AT3G48890.1	putative progesterone-binding protein homolog (Atmp2) mRNA, The mRNA is cell-to-cell mobile.	MEMBRANE-ASSOCIATED PROGESTERONE BINDING PROTEIN 3 (MAPR3)	MEMBRANE-ASSOCIATED PROGESTERONE BINDING PROTEIN 3 (MAPR3); (ATMP2);ARABIDOPSIS THALIANA MEMBRANE-ASSOCIATED PROGESTERONE BINDING PROTEIN 3 (AtMAPR3);MEMBRANE STEROID BINDING PROTEIN 2 (MSBP2)	AT3G48890.1	membrane-associated progesterone binding protein 3	MAPR3												x
at4g19410.1	'21.3.5.4'	'Cell wall organisation.pectin.modification and degradation.pectin acetylesterase'	'pectin acetylesterase (original description: | Symbols:PAE7 | pectin acetylesterase 7 | Chr4:10582188-10584766 REVERSE LENGTH=391 ) &'	AT4G19410.1	Pectinacetylesterase family protein;(source:Araport11)	PECTIN ACETYLESTERASE 7 (PAE7)	PECTIN ACETYLESTERASE 7 (PAE7);PECTIN ACETYESTERASE 7 (ATPAE7)	AT4G19410.1	Pectinacetylesterase family protein	PAE7													x
at4g30170.1	'35.1'	'not assigned.annotated'	' (original description: | Symbols:no symbol available | no full name available | Chr4:14762922-14764482 FORWARD LENGTH=325 ) & Peroxidase 45 OS=Arabidopsis thaliana (sp|q96522|per45_arath : 619.0)'	AT4G30170.1	Peroxidase family protein;(source:Araport11)	0	0	AT4G30170.1	Peroxidase family protein	0												x	x		x
at1g05240.1	'35.1'	'not assigned.annotated'	' (original description: | Symbols:no symbol available | no full name available | Chr1:1521202-1522447 FORWARD LENGTH=325 ) & Peroxidase 2 OS=Arabidopsis thaliana (sp|q67z07|per2_arath : 598.0)'	AT1G05240.1	Peroxidase superfamily protein;(source:Araport11)	PATHOGENESIS RELATED 9 (PR9)	PATHOGENESIS RELATED 9 (PR9)	AT1G05240.1	Peroxidase superfamily protein	PR9													x	x	x
at2g37130.1	'35.1'	'not assigned.annotated'	' (original description: | Symbols:no symbol available | no full name available | Chr2:15598225-15600004 REVERSE LENGTH=327 ) & Peroxidase 21 OS=Arabidopsis thaliana (sp|q42580|per21_arath : 641.0)'	AT2G37130.1	Peroxidase superfamily protein;(source:Araport11)	0	0	AT2G37130.1	Peroxidase superfamily protein	0													x		x
at3g01190.1	'35.1'	'not assigned.annotated'	' (original description: | Symbols:no symbol available | no full name available | Chr3:67236-68477 REVERSE LENGTH=321 ) & Peroxidase 27 OS=Arabidopsis thaliana (sp|q43735|per27_arath : 623.0)'	AT3G01190.1	Peroxidase superfamily protein;(source:Araport11)	0	0	AT3G01190.1	Peroxidase superfamily protein	0													x		x
at5g17820.1	'35.1'	'not assigned.annotated'	' (original description: | Symbols:no symbol available | no full name available | Chr5:5888195-5890101 REVERSE LENGTH=313 ) & Peroxidase 57 OS=Arabidopsis thaliana (sp|q43729|per57_arath : 606.0)'	AT5G17820.1	Peroxidase superfamily protein;(source:Araport11)	PEROXIDASE 57 (PER57)	PEROXIDASE 57 (PER57)	AT5G17820.1	Peroxidase superfamily protein	PER57												x	x
at1g79550.1	'2.1.1.5'	'Cellular respiration.glycolysis.cytosolic glycolysis.phosphoglycerate kinase'	'phosphoglycerate kinase (original description: | Symbols:PGK | phosphoglycerate kinase | Chr1:29924347-29926295 REVERSE LENGTH=401 ) &'	AT1G79550.1	Encodes cytosolic phosphoglycerate kinase (PGK3). Expression studies in PGK mutants showed that PGK1 and PGK3 were down-regulated in pgk3.2 and pgk1.1, respectively. These results indicate that the down-regulation of photosynthetic activity could be a plant strategy when glycolysis is impaired to achieve metabolic adjustment and optimize growth.	PHOSPHOGLYCERATE KINASE (PGK)	(PGKC);PHOSPHOGLYCERATE KINASE (PGK);PHOSPHOGLYCERATE KINASE 3 (PGK3)	AT1G79550.1	phosphoglycerate kinase	PGK													x
at4g20260.4	'35.1'	'not assigned.annotated'	' (original description: | Symbols:ATPCAP1,PCAP1,MDP25 | ARABIDOPSIS THALIANA PLASMA-MEMBRANE ASSOCIATED CATION-BINDING PROTEIN 1,microtubule-destabilizing protein 25,plasma-membrane associated cation-binding protein 1 | Chr4:10941593-10943227 FORWARD LENGTH=226 ) & Plasma membrane-associated cation-binding protein 1 OS=Arabidopsis thaliana (sp|q96262|pcap1_arath : 172.0)'	AT4G20260.4	Encodes a Ca2+ and Cu2+ binding protein. N-terminal myristylation on glycine 2 appears to enable it to associate tightly with the plasma membrane. Recombinant PCaP1 interacts strongly with phosphatidylinositol 3,5-bisphosphate (PtdIns(3,5)P2) and PtdIns (3,4,5)P3, and weakly with PtdIns(3,5)P2 and PtdIns(4,5). It also interacts with calmodulin (CaM) in a calcium-dependent manner. CaM does not int…	PLASMA-MEMBRANE ASSOCIATED CATION-BINDING PROTEIN 1 (PCAP1)	MICROTUBULE-DESTABILIZING PROTEIN 25 (MDP25);PLASMA-MEMBRANE ASSOCIATED CATION-BINDING PROTEIN 1 (PCAP1);ARABIDOPSIS THALIANA PLASMA-MEMBRANE ASSOCIATED CATION-BINDING PROTEIN 1 (ATPCAP1)	AT4G20260.4	plasma-membrane associated cation-binding protein 1	PCAP1												x
at2g47540.1	'21.4.1.2.1'	'Cell wall organisation.cell wall proteins.hydroxyproline-rich glycoprotein activities.proline-rich protein activities.glycoprotein'	'cell wall glycoprotein (original description: | Symbols:no symbol available | no full name available | Chr2:19505901-19506504 FORWARD LENGTH=173 ) &'	AT2G47540.1	Pollen Ole e 1 allergen and extensin family protein;(source:Araport11)	0	0	AT2G47540.1	Pollen Ole e 1 allergen and extensin family protein	0												x
at5g05500.1	'35.2'	'not assigned.not annotated'	' no hits & (original description: | Symbols:PRPL1,AtPRPL1,MOP10 | proline-rich protein-like 1 | Chr5:1629716-1630267 FORWARD LENGTH=183 )'	AT5G05500.1	Encodes Proline-rich protein-like PRPL1, controls elongation of root hairs.	(MOP10)	(ATPRPL1); (MOP10);PROLINE-RICH PROTEIN-LIKE 1 (PRPL1)	AT5G05500.1	Pollen Ole e 1 allergen and extensin family protein	MOP10													x	x	x
at4g14060.1	'35.1'	'not assigned.annotated'	' (original description: | Symbols:no symbol available | no full name available | Chr4:8107405-8108158 FORWARD LENGTH=151 ) & MLP-like protein 328 OS=Arabidopsis thaliana (sp|q9zvf3|ml328_arath : 281.0)'	AT4G14060.1	Polyketide cyclase/dehydrase and lipid transport superfamily protein;(source:Araport11)	0	0	AT4G14060.1	Polyketide cyclase/dehydrase and lipid transport superfamily protein	0												x
at4g23680.1	'35.1'	'not assigned.annotated'	' (original description: | Symbols:no symbol available | no full name available | Chr4:12336416-12337417 REVERSE LENGTH=151 ) & MLP-like protein 328 OS=Arabidopsis thaliana (sp|q9zvf3|ml328_arath : 238.0)'	AT4G23680.1	Polyketide cyclase/dehydrase and lipid transport superfamily protein;(source:Araport11)	0	0	AT4G23680.1	Polyketide cyclase/dehydrase and lipid transport superfamily protein	0												x
at2g19760.1	'20.2.2.3'	'Cytoskeleton organisation.microfilament network.actin polymerisation.profilin actin nucleation protein'	'profilin actin nucleation protein (original description: | Symbols:PFN1,PRF1 | profilin 1,PROFILIN 1 | Chr2:8517074-8518067 REVERSE LENGTH=131 ) &'	AT2G19760.1	first member of the Arabidopsis profilin multigene family, expressed in all organs of Arabidopsis. Binds poly-L-proline. The first intron of PRF1 enhances gene expression in vegetative tissues.	PROFILIN 1 (PRF1)	PROFILIN 1 (PRF1);PROFILIN 1 (PFN1)	AT2G19760.1	profilin 1	PRF1																x
at4g02270.1	'21.4.1.2.1'	'Cell wall organisation.cell wall proteins.hydroxyproline-rich glycoprotein activities.proline-rich protein activities.glycoprotein'	'cell wall glycoprotein (original description: | Symbols:RHS13 | root hair specific 13 | Chr4:992383-992996 REVERSE LENGTH=165 ) &'	AT4G02270.1	root hair specific 13;(source:Araport11)	ROOT HAIR SPECIFIC 13 (RHS13)	SEED AND ROOT HAIR PROTECTIVE PROTEIN (SRPP);ROOT HAIR SPECIFIC 13 (RHS13)	AT4G02270.1	root hair specific 13	RHS13												x		x	x
at4g26220.1	'21.6.1.4'	'Cell wall organisation.lignin.monolignol biosynthesis.caffeoyl-CoA 3-O-methyltransferase (CCoA-OMT)'	'caffeoyl-CoA 3-O-methyltransferase (CCoA-OMT) (original description: | Symbols:CCoAOMT7 | caffeoyl coenzyme A ester O-methyltransferase 7 | Chr4:13284179-13285146 FORWARD LENGTH=232 ) &'	AT4G26220.1	Encodes a caffeoyl-coenzyme A O-methyltransferase (CCoAOMT)-like protein with a strong preference for methylating the para position of flavanones and dihydroflavonols, whereas flavones and flavonols are methylated in the meta-position.	CAFFEOYL COENZYME A ESTER O-METHYLTRANSFERASE 7 (CCOAOMT7)	CAFFEOYL COENZYME A ESTER O-METHYLTRANSFERASE 7 (CCOAOMT7)	AT4G26220.1	S-adenosyl-L-methionine-dependent methyltransferases superfamily protein	CCOAOMT7														x
at1g58270.1	'35.2'	'not assigned.not annotated'	' no hits & (original description: | Symbols:ZW9 | | Chr1:21612394-21614089 REVERSE LENGTH=396 )'	AT1G58270.1	ZW9 mRNA, complete cds The mRNA is cell-to-cell mobile.	(ZW9)	(ZW9)	AT1G58270.1	TRAF-like family protein	ZW9												x
at1g45201.1	'5.7.1.2.3'	'Lipid metabolism.lipid degradation.triacylglycerol lipase activities.diacyl-/triacylglycerol lipase activities.lipase (OBL)'	'lipase (OBL) (original description: | Symbols:TLL1,ATTLL1 | ARABIDOPSIS THALIANA TRIACYLGLYCEROL LIPASE-LIKE 1,triacylglycerol lipase-like 1 | Chr1:17123889-17128462 FORWARD LENGTH=479 ) &'	AT1G45201.1	Target of AtGRP7 regulation.	TRIACYLGLYCEROL LIPASE-LIKE 1 (TLL1)	ARABIDOPSIS THALIANA TRIACYLGLYCEROL LIPASE-LIKE 1 (ATTLL1);TRIACYLGLYCEROL LIPASE-LIKE 1 (TLL1)	AT1G45201.1	triacylglycerol lipase-like 1	TLL1												x
at3g55440.1	'2.1.1.3'	'Cellular respiration.glycolysis.cytosolic glycolysis.triosephosphate isomerase'	'triosephosphate isomerase (original description: | Symbols:ATCTIMC,CYTOTPI,TPI | CYTOSOLIC ISOFORM TRIOSE PHOSPHATE ISOMERASE,triosephosphate isomerase,CYTOSOLIC TRIOSE PHOSPHATE ISOMERASE | Chr3:20553794-20556078 FORWARD LENGTH=254 ) &'	AT3G55440.1	Encodes triosephosphate isomerase.	TRIOSEPHOSPHATE ISOMERASE (TPI)	CYTOSOLIC TRIOSE PHOSPHATE ISOMERASE (ATCTIMC);CYTOSOLIC ISOFORM TRIOSE PHOSPHATE ISOMERASE (CYTOTPI);TRIOSEPHOSPHATE ISOMERASE (TPI)	AT3G55440.1	triosephosphate isomerase	TPI												x
at3g55440.1	'3.1.2.1'	'Carbohydrate metabolism.sucrose metabolism.biosynthesis.cytosolic triose-phosphate isomerase'	'cytosolic triose-phosphate isomerase (original description: | Symbols:ATCTIMC,CYTOTPI,TPI | CYTOSOLIC ISOFORM TRIOSE PHOSPHATE ISOMERASE,triosephosphate isomerase,CYTOSOLIC TRIOSE PHOSPHATE ISOMERASE | Chr3:20553794-20556078 FORWARD LENGTH=254 ) &'	AT3G55440.1	Encodes triosephosphate isomerase.	TRIOSEPHOSPHATE ISOMERASE (TPI)	CYTOSOLIC TRIOSE PHOSPHATE ISOMERASE (ATCTIMC);CYTOSOLIC ISOFORM TRIOSE PHOSPHATE ISOMERASE (CYTOTPI);TRIOSEPHOSPHATE ISOMERASE (TPI)	AT3G55440.1	triosephosphate isomerase	TPI												x
at4g30270.1	'50.2.4'	'Enzyme classification.EC_2 transferases.EC_2.4 glycosyltransferase'	'Xyloglucan endotransglucosylase/hydrolase protein 24 OS=Arabidopsis thaliana (sp|p24806|xth24_arath : 536.0) & Enzyme classification.EC_2 transferases.EC_2.4 glycosyltransferase(50.2.4 : 315.3) (original description: | Symbols:MERI5B,XTH24,MERI-5,SEN4 | xyloglucan endotransglucosylase/hydrolase 24,SENESCENCE 4,MERISTEM 5,meristem-5 | Chr4:14819445-14820448 REVERSE LENGTH=269 ) &'	AT4G30270.1	encodes a protein similar to endo xyloglucan transferase in sequence. It is also very similar to BRU1 in soybean, which is involved in brassinosteroid response.	XYLOGLUCAN ENDOTRANSGLUCOSYLASE/HYDROLASE 24 (XTH24)	SENESCENCE 4 (SEN4);MERISTEM-5 (MERI5B);MERISTEM 5 (MERI-5);XYLOGLUCAN ENDOTRANSGLUCOSYLASE/HYDROLASE 24 (XTH24)	AT4G30270.1	xyloglucan endotransglucosylase/hydrolase 24	XTH24													x
